# Supplementary material
Source: PubMed Central journal article supplement (PMC5566010)
Supplement: 2017_166280-Disclosures_and_Contributions.pdf [file 2017_166280-Disclosures_and_Contributions.pdf]

Haematologica  
HAEMATOL/2017/166280  
Version 2

Chronic myeloid leukemia: room for improvement?

Michele Baccharani, Fabrizio Pane, Gianantonio Rosti, Domenico Russo, and Giuseppe Saglio

Disclosures: Disclosures: Michele Baccharani: consultant and speaker fees Ariad/Incyte, Bristol-Meyer Squibb, Novartis, and Pfizer. Fabrizio Pane: Advisory board Ariad/Incyte and Novartis; speaker bureau Ariad/Incyte, Bristol-Meyer Squibb, Novartis, and Pfizer; research grants Ariad/Incyte and Novartis. Gianantonio Rosti: consultant and speaker fees Novartis, BMS, Pfizer, and Incyte. Giuseppe Saglio: consultant and speaker fees Ariad/Incyte, Bristol-Meyer Squibb, Novartis, and Pfizer

Contributions: Each Author has contributed equally to the text. The final version has been written by MB and has been approved by all the other Authors.
